# Supplementary material for: The compassion and andragogy of reading circles
Source: Oxford University Press journal article supplement (doi:10.1242/dev.071308), 2013-08-01
Supplement: dev071308table_s1.pdf [file dev071308table_s1.pdf]

**List of probes, constructs, morpholinos and primers used in study**

**anti-sense mRNA in situ hybridization**

| Probe          | Linearize | Polymerase | Reference                           |
|----------------|-----------|------------|-------------------------------------|
| <i>dlx2</i>    | BamHI     | T7         | Akimenko et al., 1994               |
| <i>foxd3</i>   | BamHI     | T7         | Odenthal and Nusslein-Volhard, 1998 |
| <i>sox9b</i>   | StuI      | T7         | Yan et al., 2005                    |
| <i>sox10</i>   | Sall      | T7         | Dutton et al., 2001                 |
| <i>snai1b</i>  | XbaI      | T7         | Thisse et al., 1995                 |
| <i>crestin</i> | NotI      | T7         | Rubinstein et al., 2000             |
| <i>tlxa</i>    | BamHI     | T7         | Andermann and Weinberg, 2001        |
| <i>tfap2a</i>  | NotI      | T7         | Furthauer et al., 1997              |
| <i>tfap2c</i>  | NotI      | T3         | Li and Cornell, 2007                |
| <i>tfap2e</i>  | NotI      | T3         | Van Otterloo et al., 2010           |

| Probe            | Linearize | Polymerase | Forward Primer                          | Reverse Primer                           |
|------------------|-----------|------------|-----------------------------------------|------------------------------------------|
| <i>tfap2b</i>    | SpeI      | T7         | 5'-ATG CAC TCG TTA TAC AGG GAT CAG C-3' | 5'-AAG GCC GAG AGT TCC CTA AA-3'         |
| <i>tfap2d</i>    | SpeI      | T7         | 5'- ATG TCA GCC ACA TTT CCG GG-3'       | 5'- TCT GAT TGG TGT CCG GCG TT-3'        |
| <i>Pm-tfap2d</i> | Clal      | T7         | 5'- ATG CGA GCT GAC GGC TCC AAC AGC-3'  | 5'- CTA GTC GGC CTT GCC ACC ACG ATT G-3' |

**mRNA mixexpression**

| mRNA             | Linearize | Polymerase | Reference            |
|------------------|-----------|------------|----------------------|
| <i>tfap2a</i>    | NotI      | SP6        | Li and Cornell, 2007 |
| <i>tfap2a-GR</i> | NotI      | SP6        | Lou et al., 2005     |

| mRNA          | Linearize | Polymerase | Forward Primer                               | Reverse Primer                           | Shuttle Vector |
|---------------|-----------|------------|----------------------------------------------|------------------------------------------|----------------|
| Dm-tfap2      | NotI      | SP6        | 5'-CAC CAT GCA CAT TCT ACA CC-3'             | 5'-TCA TTT CTT TTC GTT GTC AAT TTT-3'    | pENTR/D-TOPO   |
| Bf-tfap2      | NotI      | SP6        | 5'-CAC CAT GGC TCA ATT GAG C-3'              | 5'-TCA CTT GCC GTC CTC CAT T-3'          | pENTR/D-TOPO   |
| Pm-tfap2      | NotI      | SP6        | 5'-GAA TTC ATG CTT TTG AAA TTA CAG GAC AA-3' | 5'-GAA TTC TCA CTT TCC CCG GTG ATG TT-3' | pCR4-TOPO      |
| Pm-tfap2d     | NotI      | SP6        | 5'-CAC CAT GCG AGC TGA CGG CTC-3'            | 5'-CTA GTC GGC CTT GCC ACC-3'            | pENTR/D-TOPO   |
| <i>tfap2b</i> | NotI      | SP6        | 5'-ATG CTG TGG AAA CTG GTG GAA A-3'          | 5'-TCA TTT CCT GTG TTT TTC CTC-3'        | pSCA           |
| <i>tfap2c</i> | NotI      | SP6        | 5'-GAA TTC C AT GTT GTG GAA ATT AGC A-3'     | 5'-CCA TCG AGT CTC ACT TTC GG-3'         | pCR4-TOPO      |
| <i>tfap2d</i> | NotI      | SP6        | 5'-GGA TCC ATG TCA GCC ACA TTT CCG GGA-3'    | 5'-TCA TTC CGT CTT CTC GAT TTT-3'        | pSCA           |
| <i>tfap2e</i> | NotI      | SP6        | 5'-GGA TCC ATG TTA GTC CAC TCC TAC T-3'      | 5'-TTA TTT GCG GTG CTT GAG CT-3'         | pSCA           |

Red = added restriction site or sequence for directional cloning

| <b>Morpholinos</b>           |               |                      |                                         |                                  |
|------------------------------|---------------|----------------------|-----------------------------------------|----------------------------------|
| <b>Name</b>                  | <b>Target</b> | <b>Reference</b>     | <b>Sequence</b>                         |                                  |
| <i>tfap2a e2i2</i>           | <i>tfap2a</i> | Li and Cornell, 2007 | 5'-AGC TTT TCT TCT TAC CTG AAC ATC T-3' |                                  |
| <i>tfap2c e3i3</i>           | <i>tfap2c</i> | Li and Cornell, 2007 | 5'-TCT GAC ATC†AAC†TCA CCT GAA CAT C-3  |                                  |
| <b>Real-time PCR primers</b> |               |                      |                                         |                                  |
| <b>Gene</b>                  | <b>Target</b> | <b>Experiment</b>    | <b>Forward Primer</b>                   | <b>Reverse Primer</b>            |
| <i>sox10</i>                 | promoter      | ChIP                 | 5'-GCA AAA CTC AGC AGC CAA TC-3         | 5'-TTA AAG AGC CCC GTT GTG TG-3' |
| <i>sox10</i>                 | off-target    | ChIP                 | 5'-AGC AAG AGT TGC GAG CAA AG-3'        | 5'-TTC AGC GGC TGT TTT CTG TC-3' |
| <i>sox10</i>                 | transcript    | RT-PCR               | 5'-AGG AAA CTG GCG GAT CAA TA-3'        | 5'-CTT ATC CGT CTC GTT CAG CA-3' |
| <i>zgc:85942</i>             | transcript    | RT-PCR               | 5'-AAC GGT GCT CAA TCT GTG TG-3'        | 5'-CTG AAC ACG GTT CCA CGA G-3'  |
| <i>?-actin</i>               | transcript    | RT-PCR               | 5'- GAG ATG ATG CCC CTC GTG-3'          | 5'-GCT CAA TGG GGT ATT TGA GG-3' |
